# Supplementary material
Source: Springer Nature journal article supplement (https://www.springerprofessional.de/resource/supplementary/40493_2014_8_MOESM5_ESM.pdf/11899610)

Comparing Theory with Simulation Data

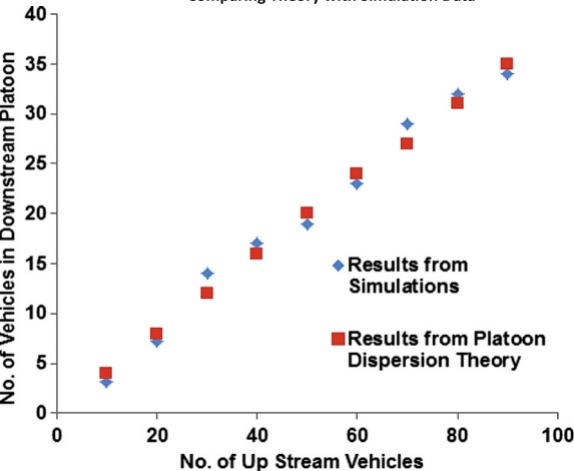

Supplement: MOESM5 [file 11899610]
